# Supplementary material for: High molecular weight dissolved organic matter enrichment selects for methylotrophs in dilution to extinction cultures
Source: PubMed Central journal article supplement — ISME J. 2015 May 15;9(12):2725–39. doi: 10.1038/ismej.2015.68 (PMC4817625; doi:10.1038/ismej.2015.68), 2015-05-15
Supplement: ismej201568x1.pdf [file ismej201568x1.pdf]

Supplemental Figure S1

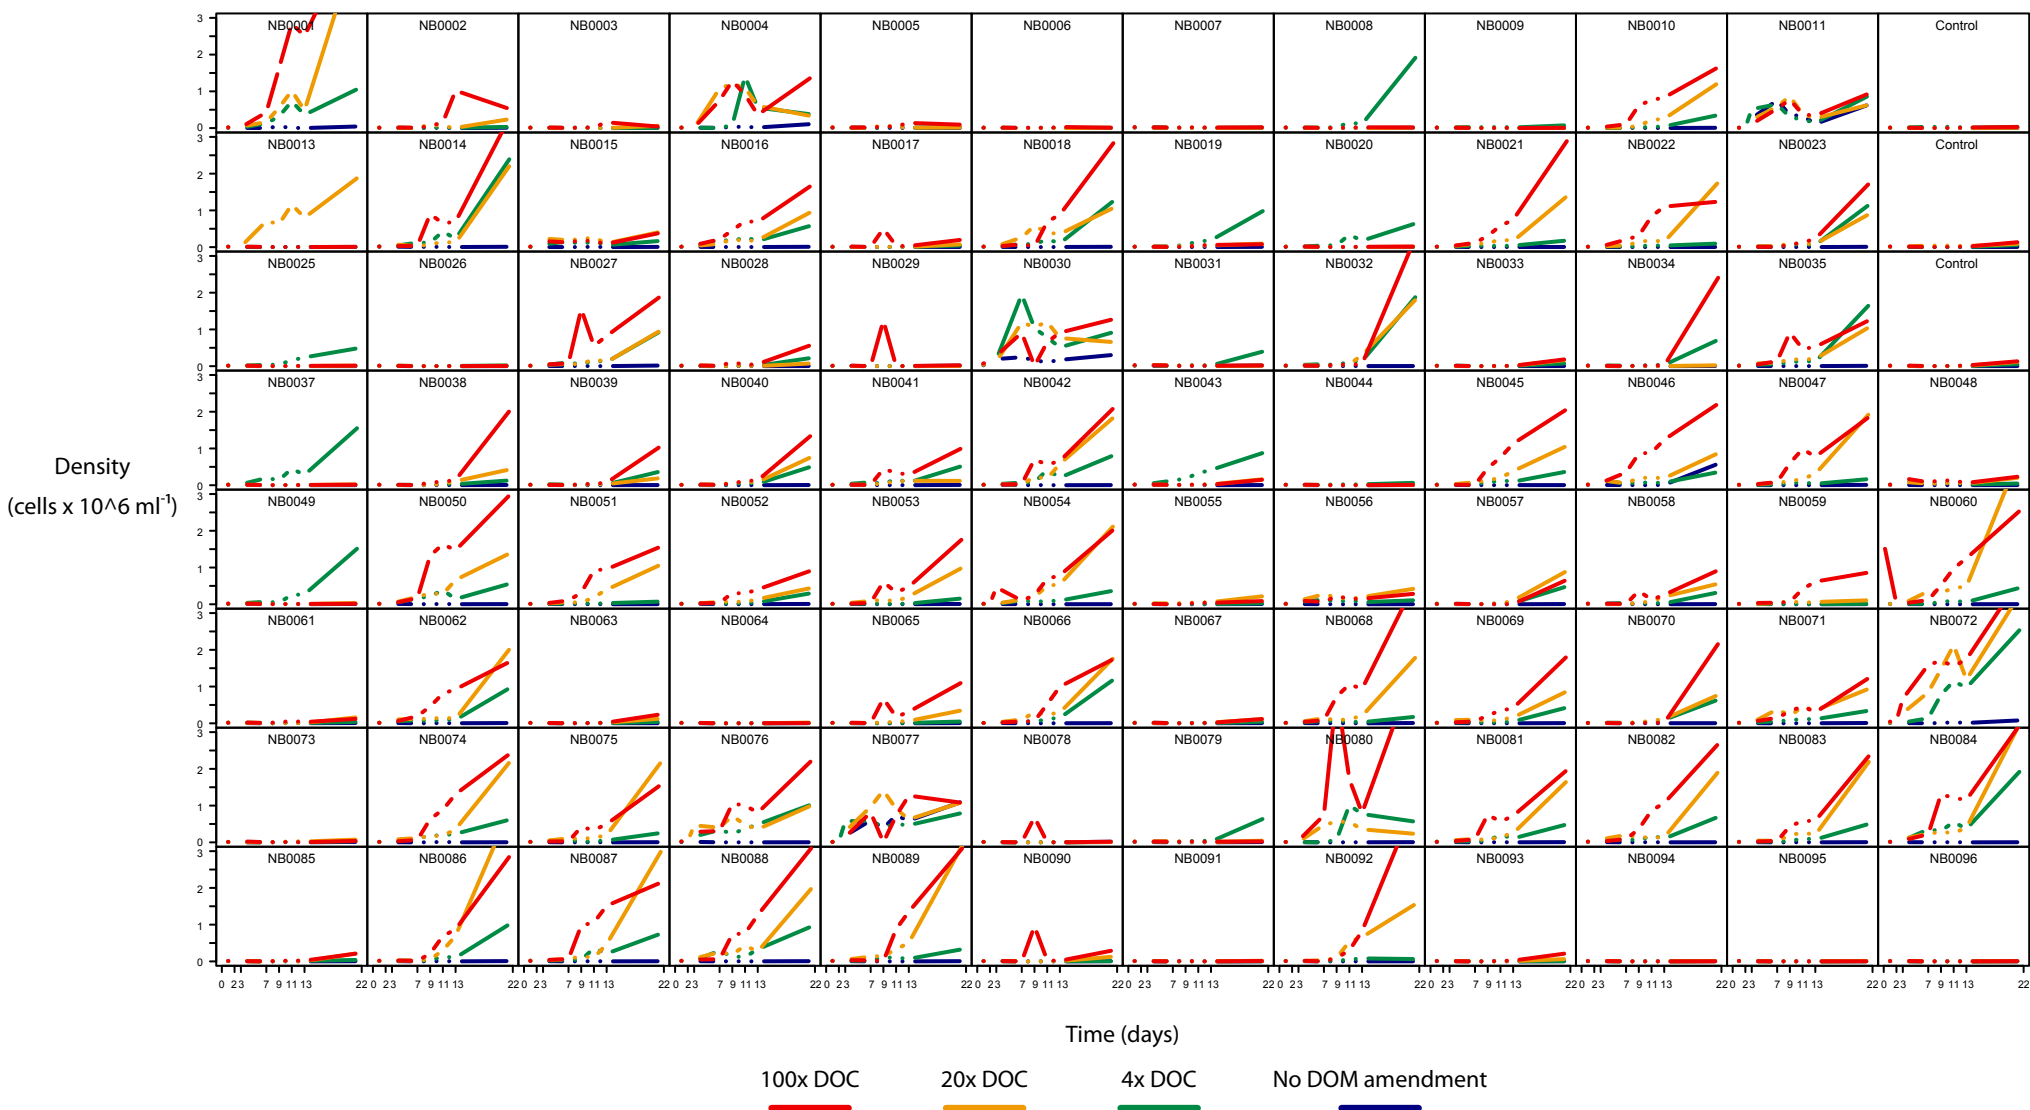

Supplemental Figure S1. Growth yields of the entire DOM enriched dilution culture collection under different HMW DOM concentrations (100x: 6930 $\mu$ M DOC, 20x: 1330 $\mu$ M DOC, 4x: 210 $\mu$ M DOC, and no DOM amendment) in TFF UV oxidized seawater.
