# Supplementary material for: High molecular weight dissolved organic matter enrichment selects for methylotrophs in dilution to extinction cultures
Source: PubMed Central journal article supplement — ISME J. 2015 May 15;9(12):2725–39. doi: 10.1038/ismej.2015.68 (PMC4817625; doi:10.1038/ismej.2015.68), 2015-05-15
Supplement: ismej201568x5.pdf [file ismej201568x5.pdf]

**Figure S5**

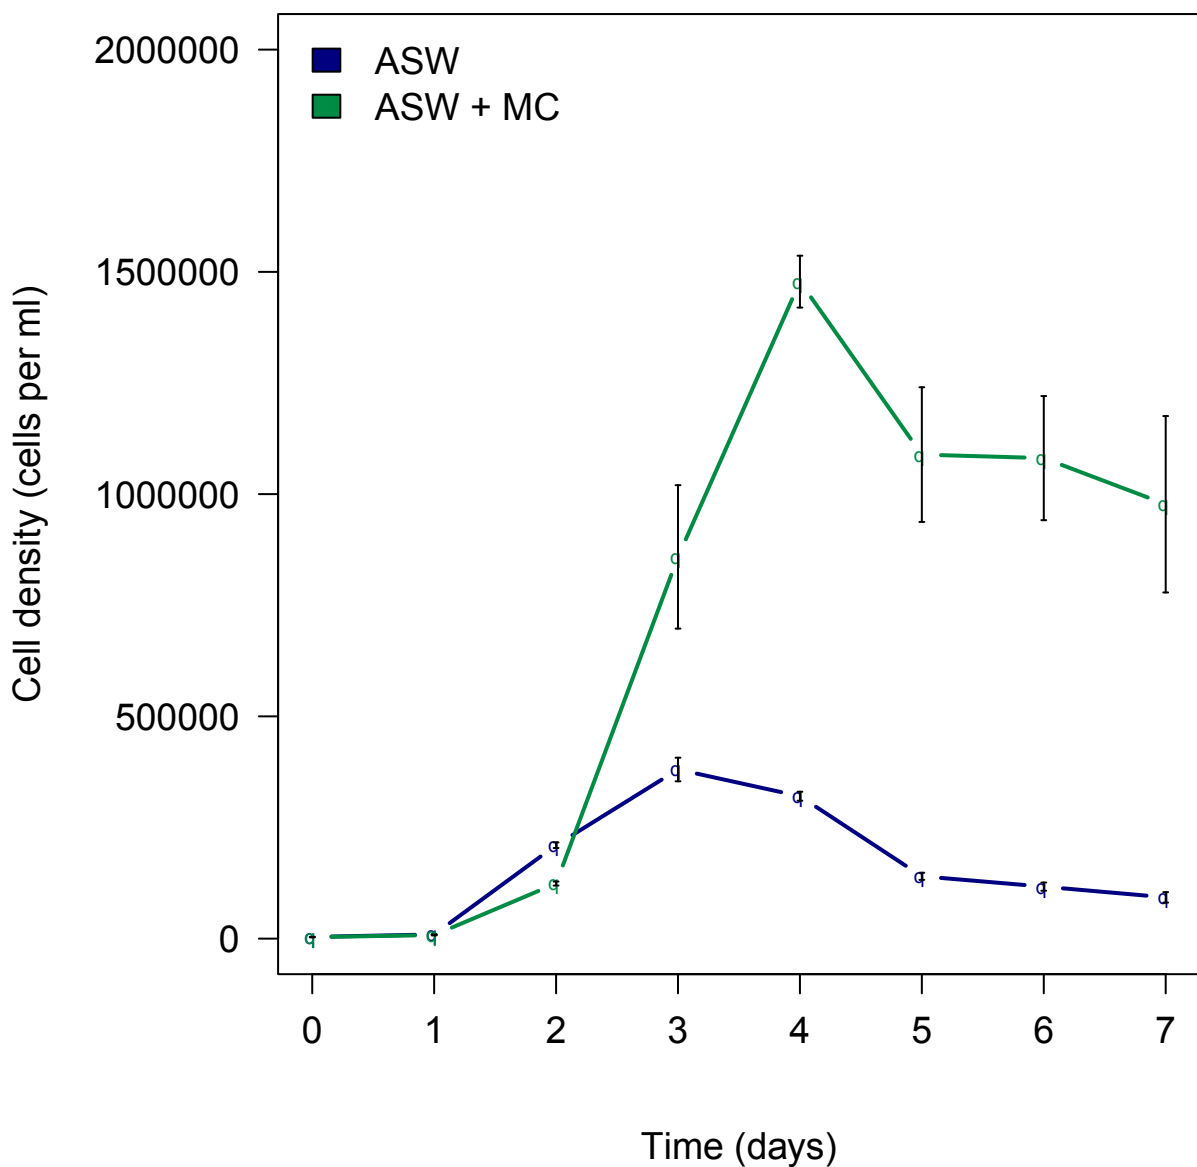

**Supplemental Figure S5.** Growth profiles of SAR92 clade isolate NB0015 in defined media.

Cells of NB0015 were grown in artificial seawater (ASW) with and without mixed carbons (MC) including D-glucose (55  $\mu$ M), succinate (85  $\mu$ M), pyruvate (114  $\mu$ M), glycerol (109  $\mu$ M), N-acetyl D-glucosamine (45  $\mu$ M), and ethanol (434  $\mu$ M). Points are the mean cell concentrations of three replicates, with error bars representing the standard deviation (where not visible, error bars are smaller than the symbols).
