# Supplementary figures and images for: High molecular weight dissolved organic matter enrichment selects for methylotrophs in dilution to extinction cultures
Source: PubMed Central journal article supplement — ISME J. 2015 May 15;9(12):2725–39. doi: 10.1038/ismej.2015.68 (PMC4817625; doi:10.1038/ismej.2015.68), 2015-05-15

Supplemental Figure S2

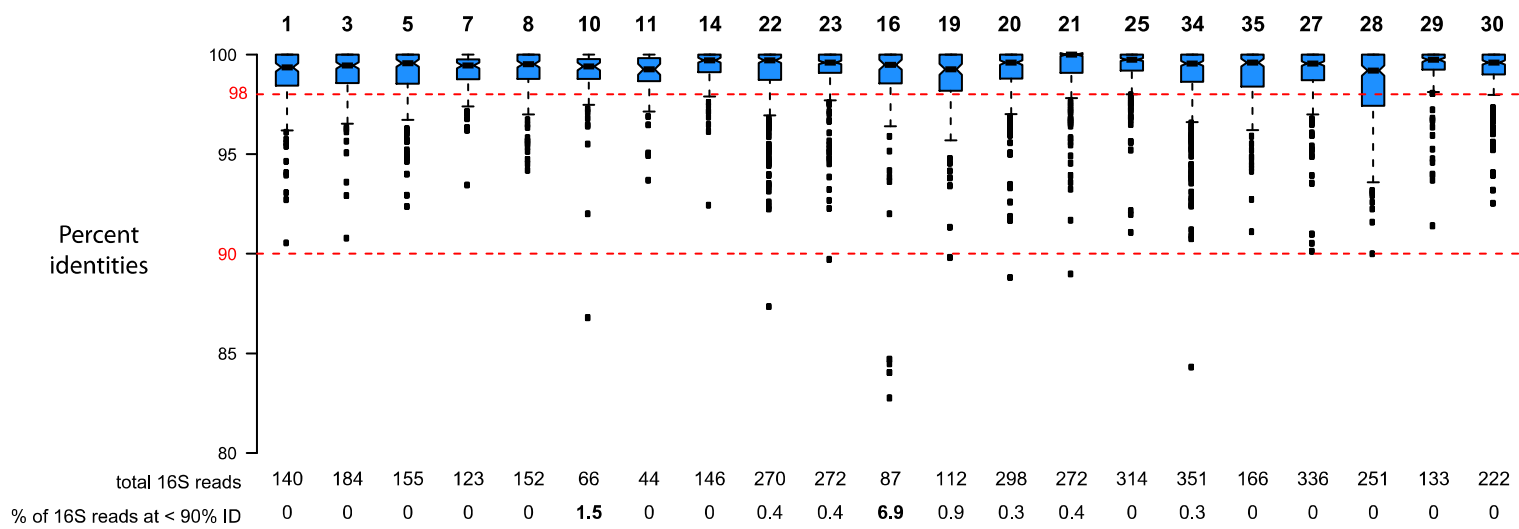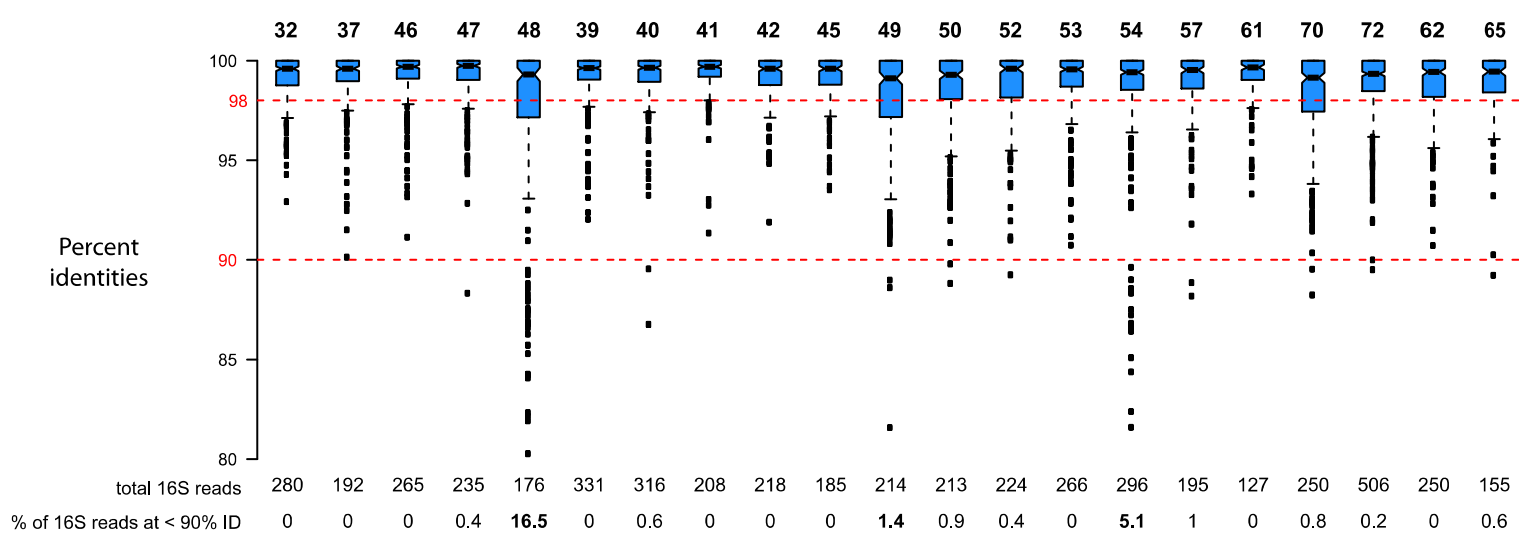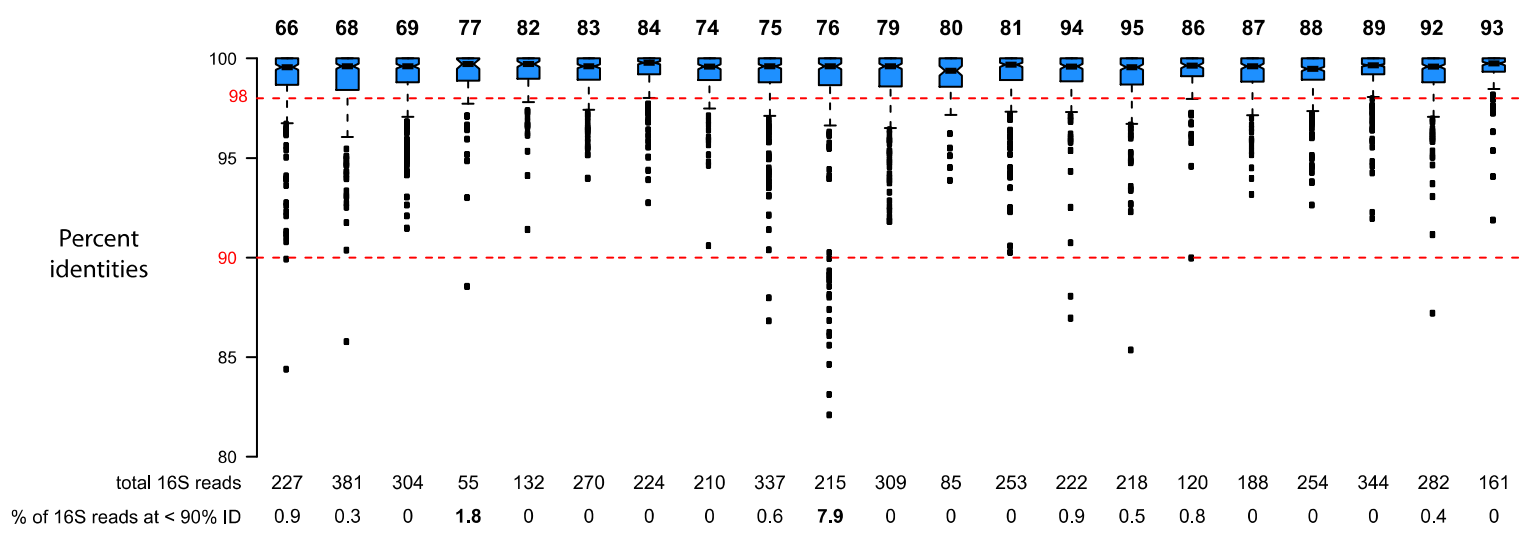

Supplement: ismej201568x2.pdf [file ismej201568x2.pdf]

Supplemental Figure 3

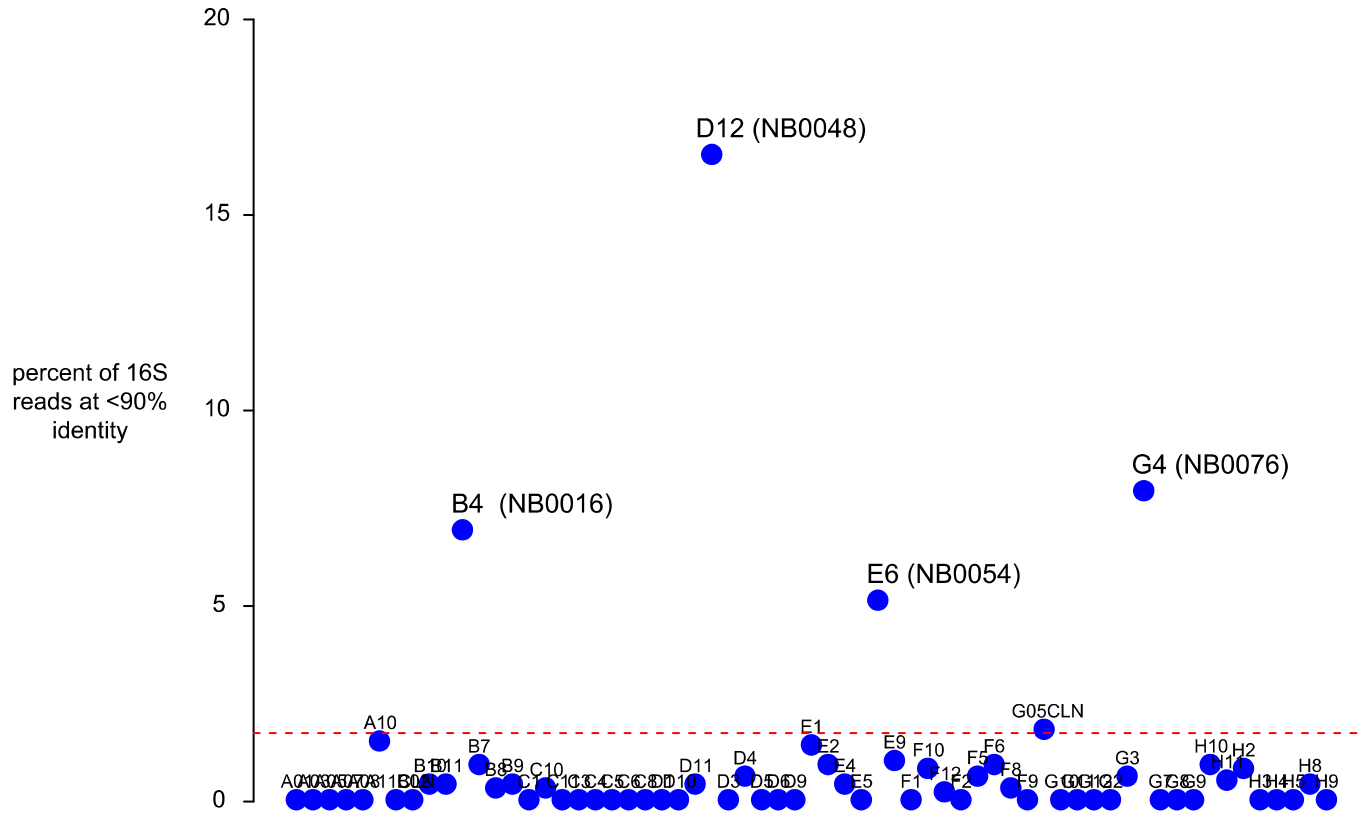

Supplement: ismej201568x3.pdf [file ismej201568x3.pdf]

0.05

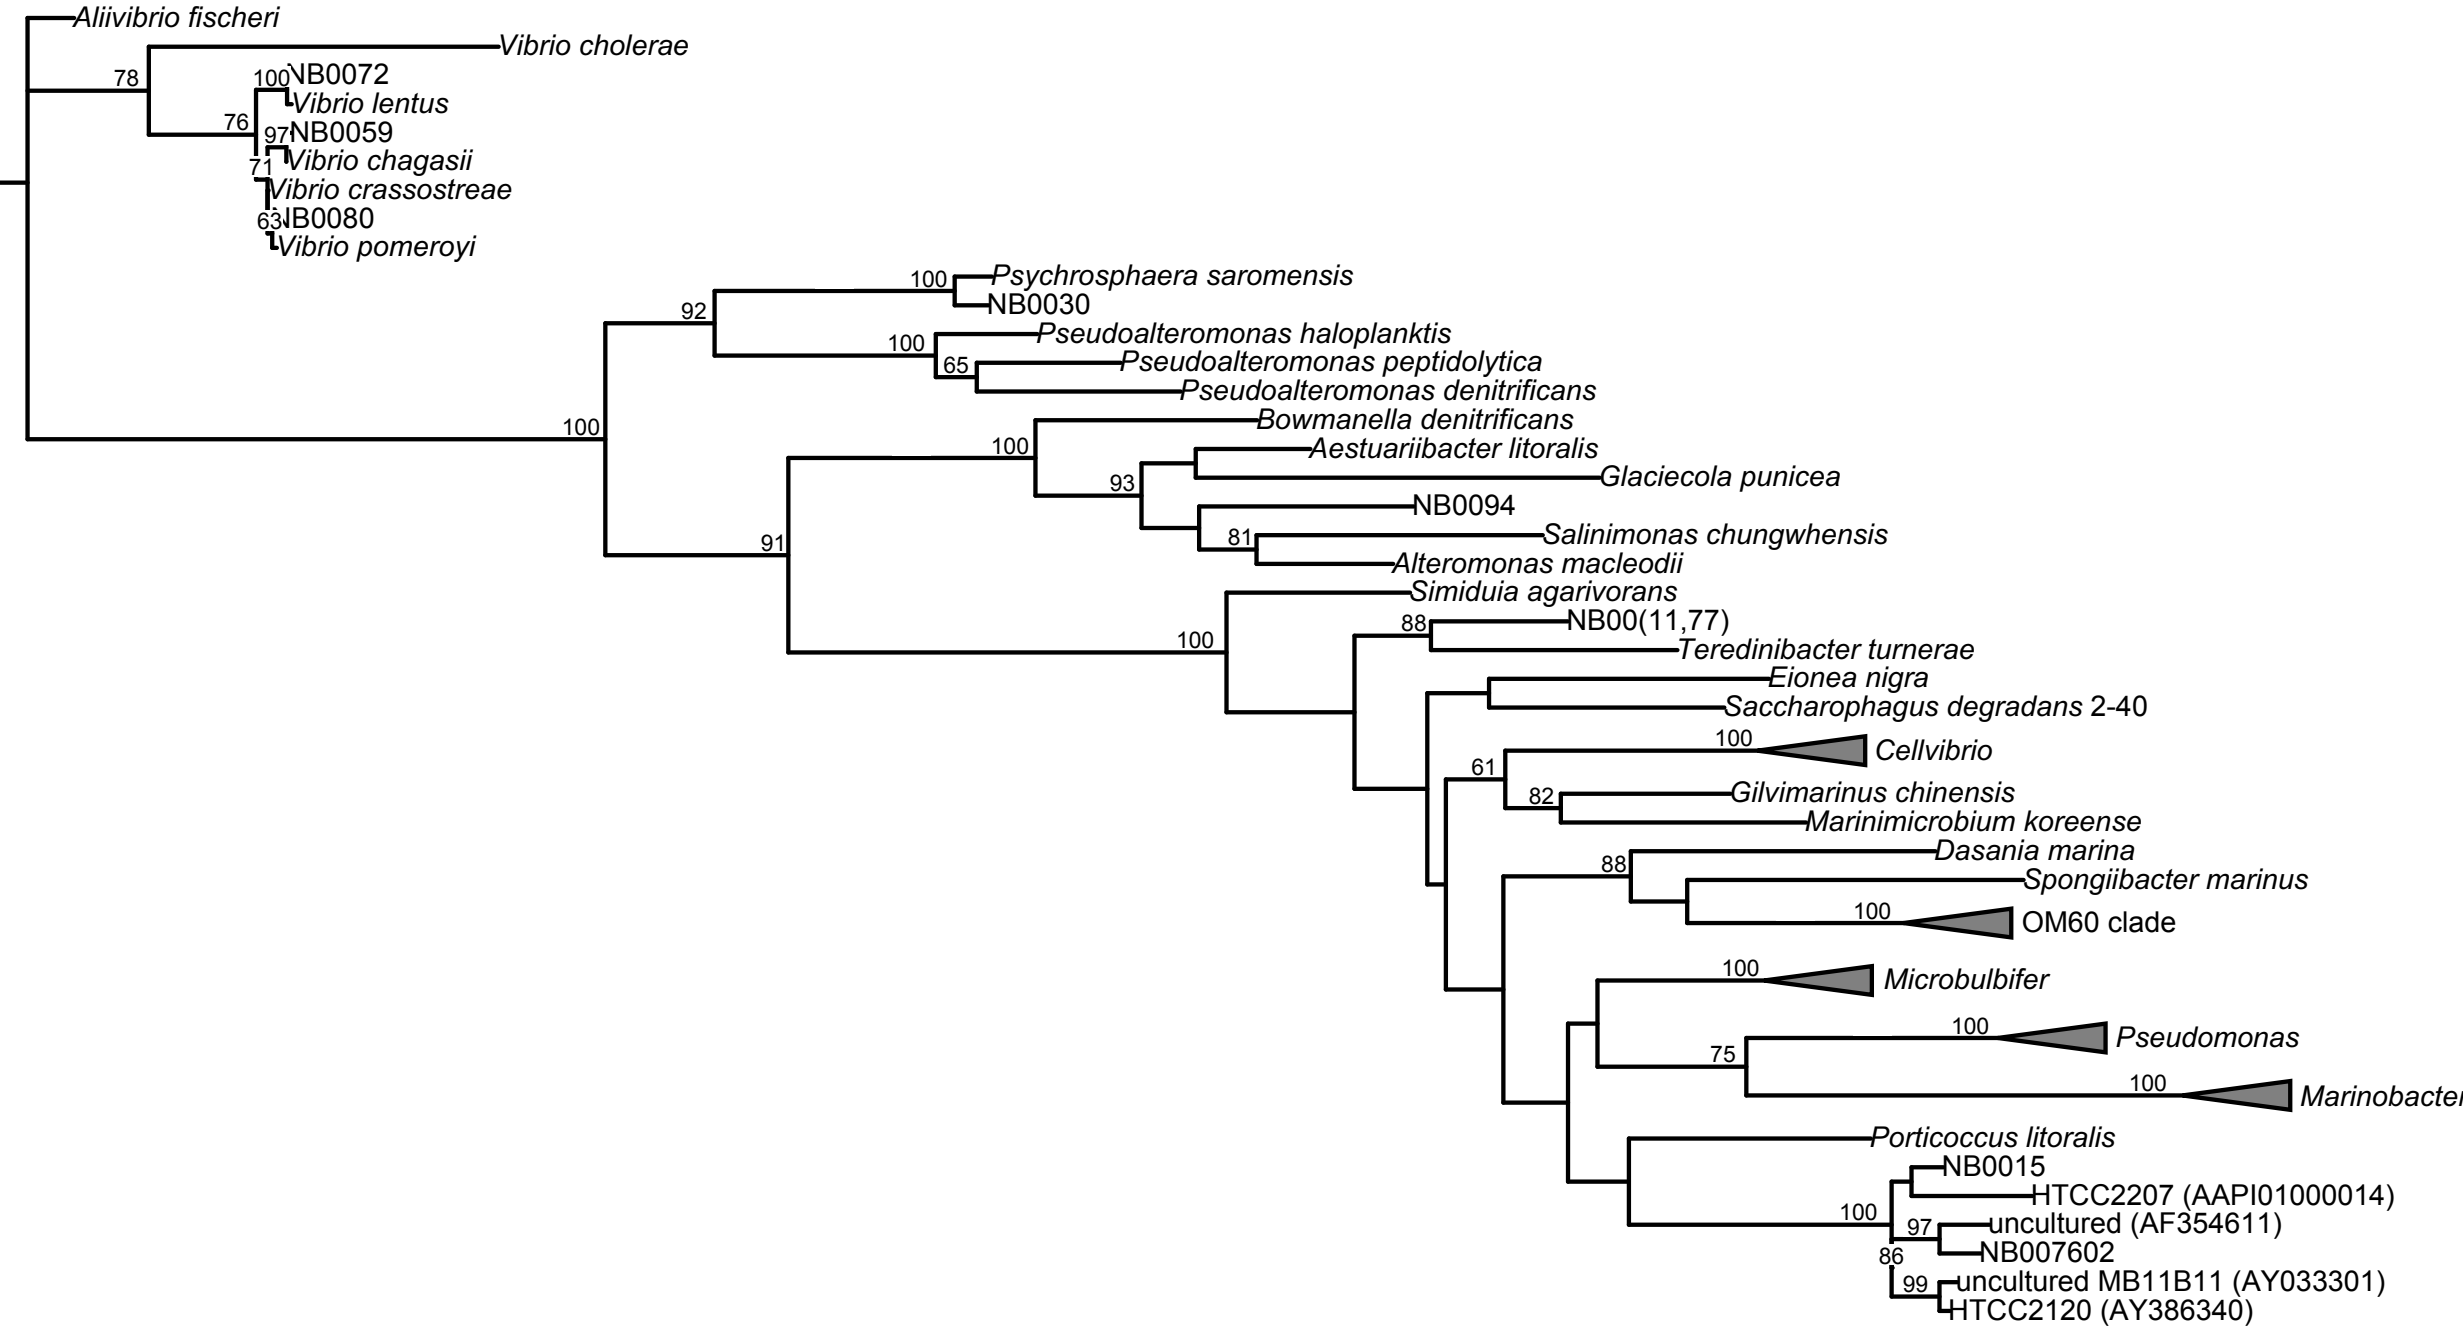

Supplement: ismej201568x4.pdf [file ismej201568x4.pdf]
